# Supplementary material
Source: PubMed Central journal article supplement (PMC4740231)
Supplement: NIHMS737611-supplement-3.pdf [file NIHMS737611-supplement-3.pdf]

### Supplemental Table 1

| <b>Human Antibodies</b> |              |                       |
|-------------------------|--------------|-----------------------|
| <u>Marker</u>           | <u>Clone</u> | <u>Vendor</u>         |
| CD1a                    | SK9          | Becton Dickinson (BD) |
| CD33                    | P67.6        | BD                    |
| CD14                    | MφP9         | BD                    |
| CD11b                   | D12          | BD                    |
| CD11c                   | S-HCL-3      | BD                    |
| CD80                    | L307.4       | BD                    |
| CD86                    | HA5.2B7      | Beckman Coulter       |
| CD83                    | HB15a        | Beckman Coulter       |
| CD40                    | MAB89        | Beckman Coulter       |
| HLA-DR                  | L243         | Biolegend             |
| DC-SIGN                 | eB-h209      | eBiosciences          |
| PD-L1                   | MIH1         | eBiosciences          |
| CD3                     | UCHT1        | Biolegend             |
